# Supplementary material
Source: PubMed Central journal article supplement (PMC6210106)
Supplement: zam022188837s1.pdf [file zam022188837s1.pdf]

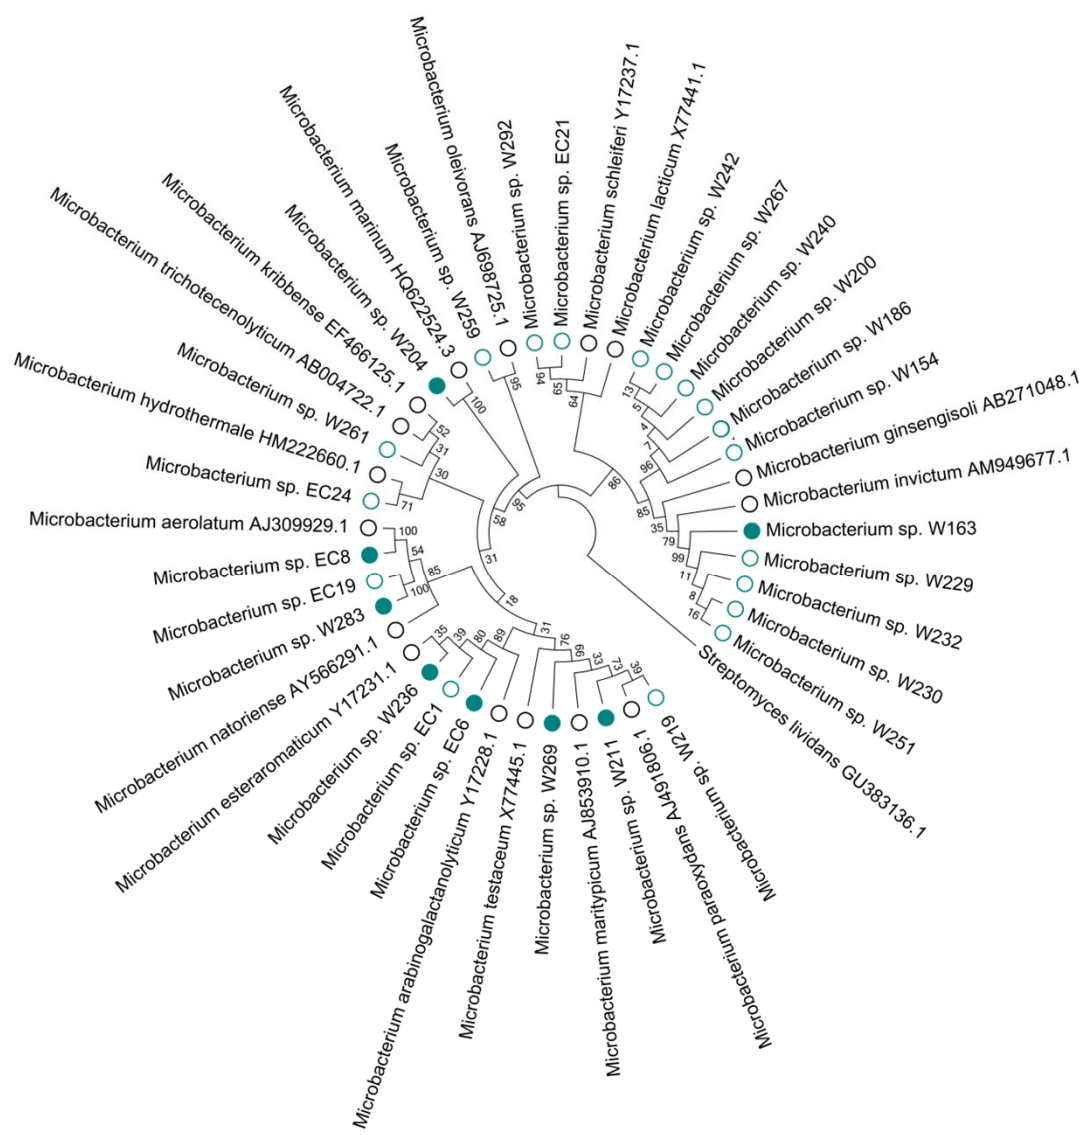

**Fig. S1.** Phylogenetic analysis of the 26 *Microbacterium* strains isolated from the rhizosphere and endosphere of sugar beet seedlings (green circle) and type strains (black circle). Neighbor-joining phylogenetic tree was constructed with MEGA6 using the 16S rRNA gene sequences. *Microbacterium* strains used in this study for functional analyses are highlighted with filled green circles.

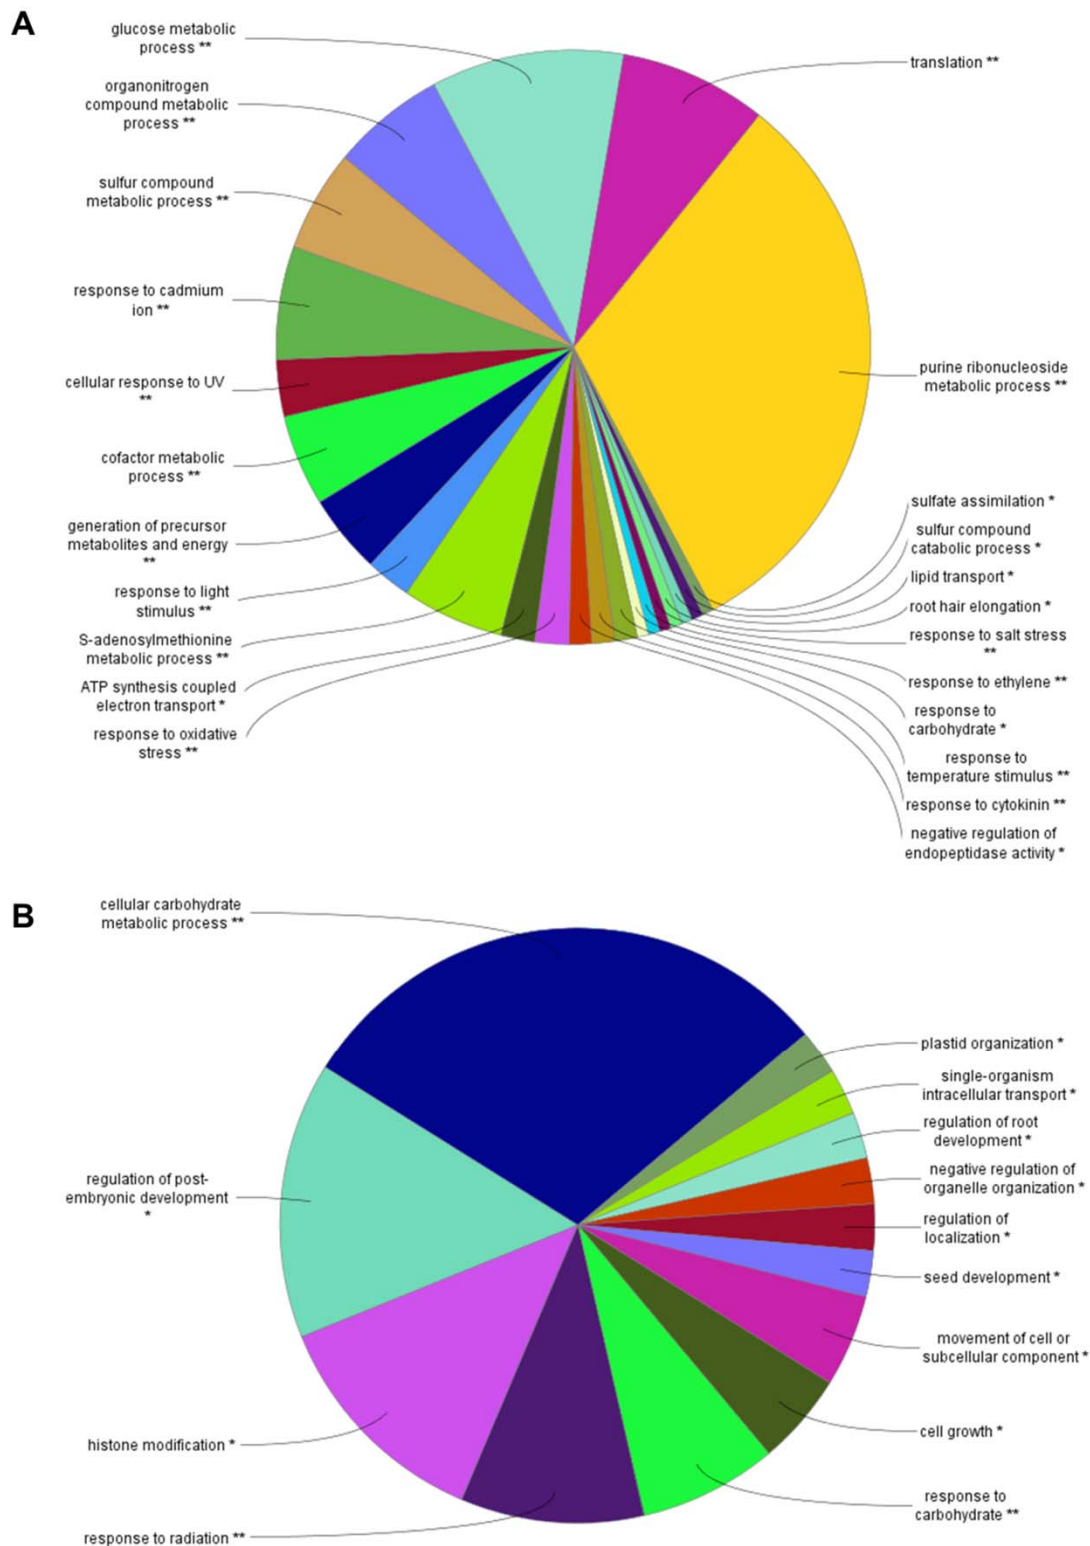

**Fig. S2.** Functional analysis of differentially expressed genes (DEGs) of *Arabidopsis* shoots exposed to volatile compounds from *Microbacterium* strain EC8. Pie charts display the distribution of Gene Ontology (GO) terms grouped by a representative molecular function enriched among the up-regulated (**A**) and down-regulated (**B**) in shoot tissue exposed to *Microbacterium* volatile compounds.

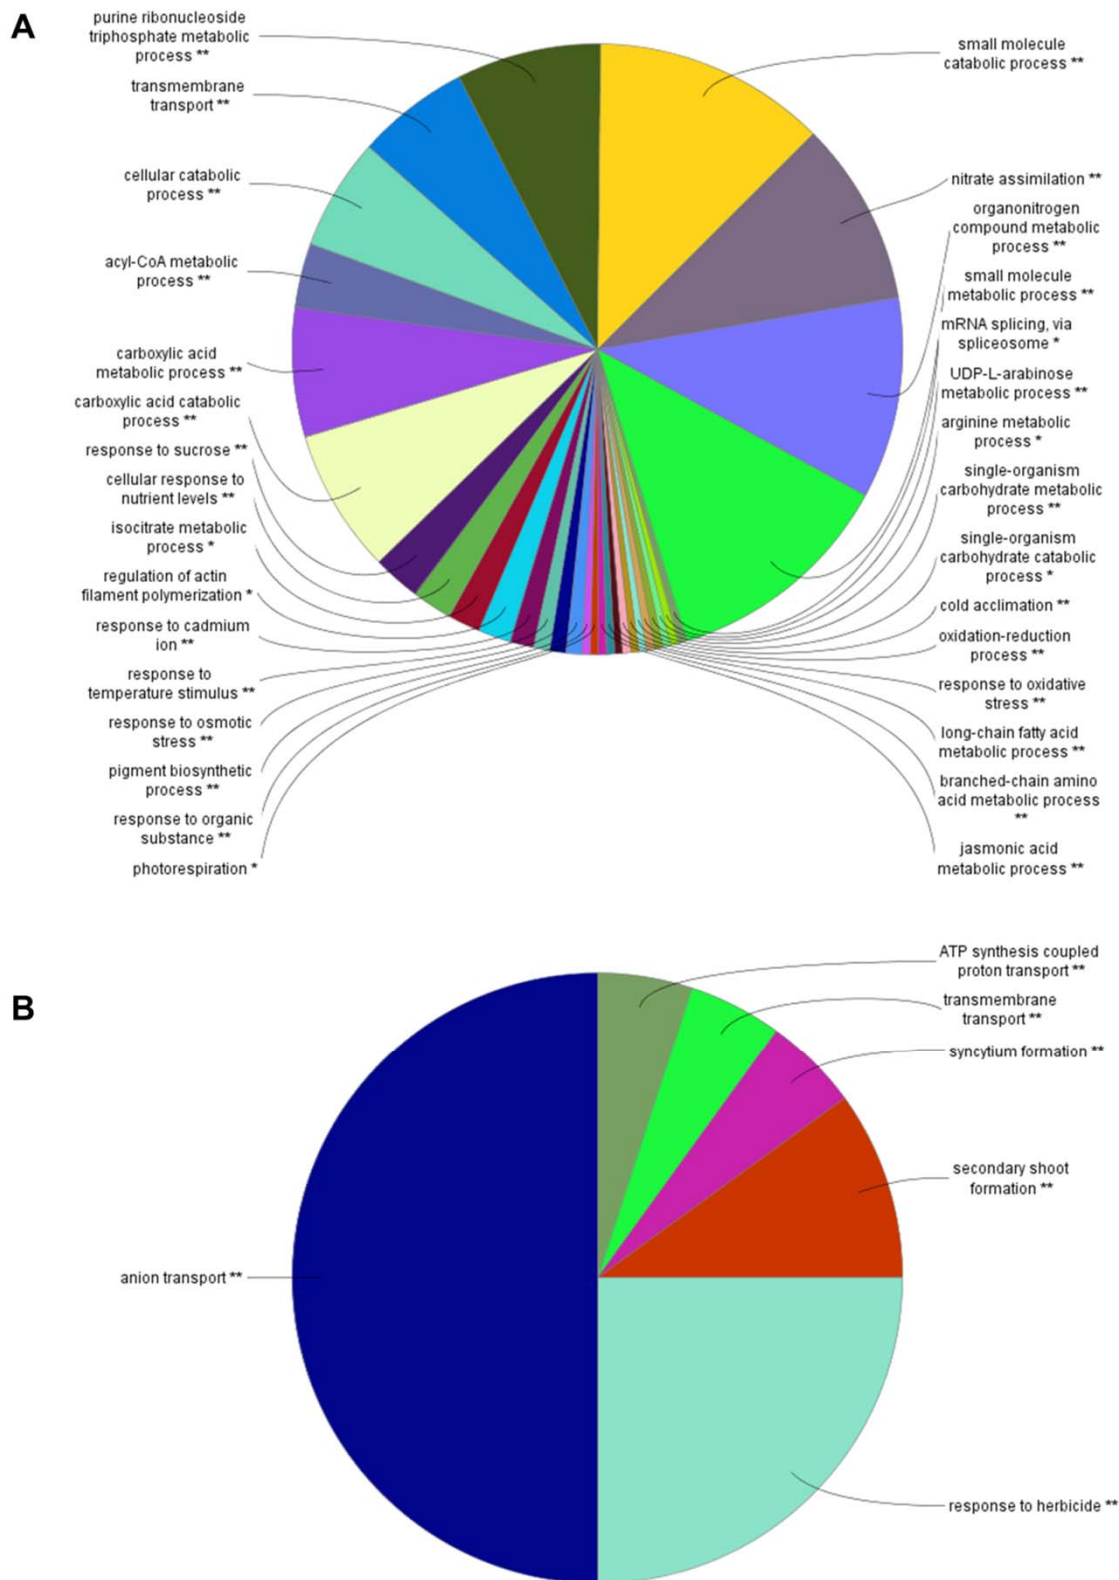

**Fig. S3.** Functional analysis of differentially expressed genes (DEGs) of *Arabidopsis* roots exposed to volatile compounds from *Microbacterium* strain EC8. Pie charts display the distribution of Gene Ontology (GO) terms grouped by a representative molecular function enriched among the up-regulated (**A**) and down-regulated (**B**) in root tissue exposed to *Microbacterium* volatile compounds.
